# Supplementary material for: Towards the Development of Global Nano-Quantitative Structure–Property Relationship Models: Zeta Potentials of Metal Oxide Nanoparticles
Source: PubMed Central journal article supplement (PMC5923573; doi:10.3390/nano8040243), 2018-04-15
Supplement: nanomaterials-08-00243-s001.pdf [file nanomaterials-08-00243-s001.pdf]

# Toward the Development of Global Nano-Quantitative Structure–Property Relationship Models: Zeta Potentials of Metal Oxide Nanoparticles

Andrey A. Toropov <sup>1</sup>, Natalia Sizochenko <sup>2,3</sup>, Alla P. Toropova <sup>1</sup> and Jerzy Leszczynski <sup>2,\*</sup>

**Table S1.** Definition of attribute of quasi-SMILES for nominal sizes.

| Range (in nm) |         | Number of samples in range | Quasi-SMILES element |
|---------------|---------|----------------------------|----------------------|
| From          | To      |                            |                      |
| 3.590         | 17.470  | 33                         | %11                  |
| 17.470        | 31.351  | 18                         | %12                  |
| 31.351        | 45.231  | 9                          | %13                  |
| 45.231        | 59.111  | 7                          | %14                  |
| 59.111        | 72.992  | 9                          | %15                  |
| 72.992        | 86.872  | 1                          | %16                  |
| 86.872        | 100.752 | 1                          | %17                  |
| -             | 114.633 | 3                          | %18                  |
| 114.633       | 128.513 | 2                          | %19                  |
| 128.513       | 142.393 | 1                          | %20                  |
| 142.393       | 156.274 | 1                          | %21                  |
| 156.274       | 170.154 | 0                          | %22                  |
| 170.154       | 184.034 | 0                          | %23                  |
| 184.034       | 197.915 | 1                          | %24                  |
| 197.915       | 211.795 | 0                          | %25                  |
| 211.795       | 225.675 | 0                          | %26                  |
| 225.675       | 239.556 | 0                          | %27                  |
| 239.556       | 253.436 | 0                          | %28                  |
| 253.436       | 267.316 | 0                          | %29                  |
| 267.316       | 281.197 | 0                          | %30                  |
| -             | 295.077 | 0                          | %31                  |
| 295.077       | 308.957 | 0                          | %32                  |
| 308.957       | 322.838 | 0                          | %33                  |
| 322.838       | 336.718 | 0                          | %34                  |
| 336.718       | 350.598 | 0                          | %35                  |
| 350.598       | 364.479 | 0                          | %36                  |
| 364.479       | 378.359 | 0                          | %37                  |
| 378.359       | 392.239 | 0                          | %38                  |
| 392.239       | 406.120 | 0                          | %39                  |
| 406.120       | 420.000 | 1                          | %40                  |

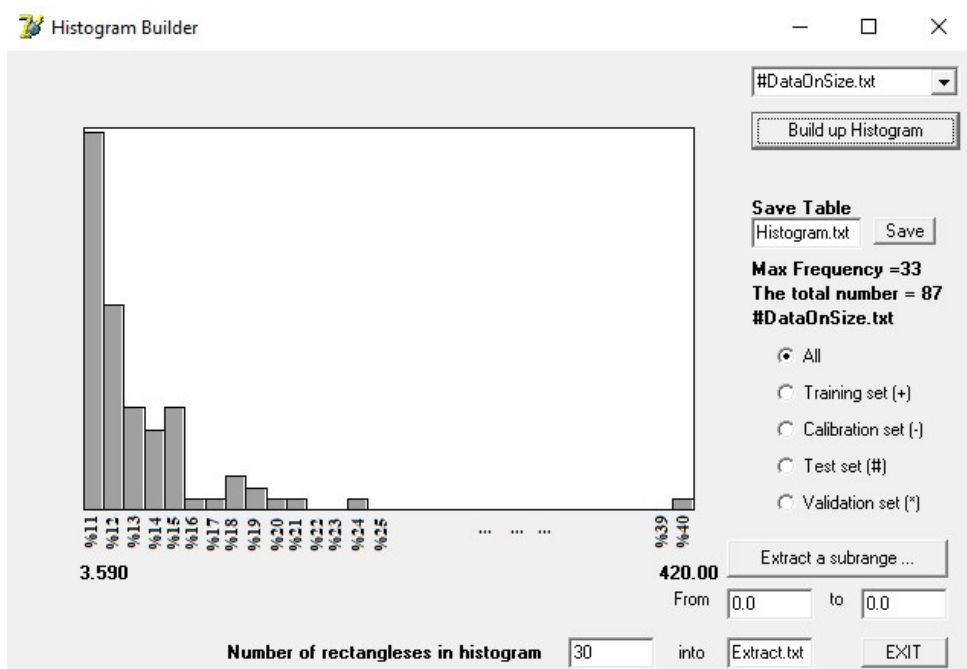

**Figure S1.** Distribution of quasi-SMILES attributes for nominal sizes.

**Table S2.** Definition of attribute of quasi-SMILES for sizes in H<sub>2</sub>O.

| Range (in nm) |          | Number of samples in range | Quasi-SMILES element |
|---------------|----------|----------------------------|----------------------|
| From          | From     |                            |                      |
| 28.900        | 227.937  | 37                         | %51                  |
| 227.937       | 426.973  | 23                         | %52                  |
| 426.973       | 626.010  | 7                          | %53                  |
| 626.010       | 825.047  | 5                          | %54                  |
| 825.047       | 1024.083 | 1                          | %55                  |
| 1024.083      | 1223.120 | 0                          | %56                  |
| 1223.120      | 1422.157 | 1                          | %57                  |
| 1422.157      | 1621.193 | 5                          | %58                  |
| 1621.193      | 1820.230 | 1                          | %59                  |
| 1820.230      | 2019.267 | 1                          | %60                  |
| 2019.267      | 2218.303 | 0                          | %61                  |
| 2218.303      | 2417.340 | 1                          | %62                  |
| 2417.340      | 2616.377 | 1                          | %63                  |
| 2616.377      | 2815.413 | 1                          | %64                  |
| 2815.413      | 3014.450 | 0                          | %65                  |
| 3014.450      | 3213.487 | 0                          | %66                  |
| 3213.487      | 3412.523 | 0                          | %67                  |
| 3412.523      | 3611.560 | 0                          | %68                  |
| 3611.560      | 3810.597 | 0                          | %69                  |
| 3810.597      | 4009.633 | 1                          | %70                  |
| 4009.633      | 4208.670 | 1                          | %71                  |
| 4208.670      | 4407.707 | 0                          | %72                  |
| 4407.707      | 4606.743 | 0                          | %73                  |
| 4606.743      | 4805.780 | 0                          | %74                  |
| 4805.780      | 5004.817 | 0                          | %75                  |
| 5004.817      | 5203.853 | 0                          | %76                  |
| 5203.853      | 5402.890 | 0                          | %77                  |
| 5402.890      | 5601.927 | 0                          | %78                  |

|          |          |   |     |
|----------|----------|---|-----|
| 5601.927 | 5800.963 | 0 | %79 |
| 5800.963 | 6000.000 | 1 | %80 |

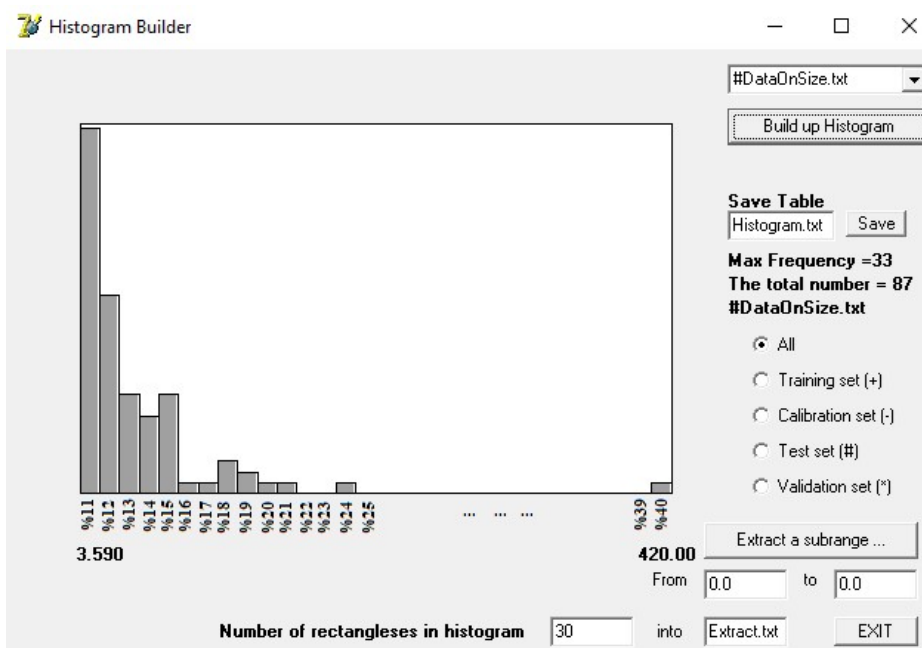

Figure S2. Distribution of quasi-SMILES attributes for sizes in media.

Table S3. Three splits into the training (+), invisible training (-), calibration (#), and validation sets.

| SPLIT 1                         | SPLIT 2                         | SPLIT 3                         |
|---------------------------------|---------------------------------|---------------------------------|
| *1. O=[Al]O[Al]=O%11%51         | -1. O=[Al]O[Al]=O%11%51         | *1. O=[Al]O[Al]=O%11%51         |
| -2. O=[Al]O[Al]=O%15%54         | -2. O=[Al]O[Al]=O%15%54         | #2. O=[Al]O[Al]=O%15%54         |
| -3. O=[Al]O[Al]=O%11%52         | #3. O=[Al]O[Al]=O%11%52         | -3. O=[Al]O[Al]=O%11%52         |
| -4. O=[Al]O[Al]=O%12%51         | +4. O=[Al]O[Al]=O%12%51         | +4. O=[Al]O[Al]=O%12%51         |
| -5. O=[Al]O[Al]=O%13%52         | -5. O=[Al]O[Al]=O%13%52         | +5. O=[Al]O[Al]=O%13%52         |
| -6. O=[Al]O[Al]=O%14%52         | +6. O=[Al]O[Al]=O%14%52         | -6. O=[Al]O[Al]=O%14%52         |
| *7. O=[Bi]O[Bi]=O%21%71         | +7. O=[Bi]O[Bi]=O%21%71         | #7. O=[Bi]O[Bi]=O%21%71         |
| -8. O=[Ce][Ce]=O%11%51          | *8. O=[Ce][Ce]=O%11%51          | #8. O=[Ce][Ce]=O%11%51          |
| *9. O=[Ce][Ce]=O%11%51          | -9. O=[Ce][Ce]=O%11%51          | #9. O=[Ce][Ce]=O%11%51          |
| +10. O=[Ce][Ce]=O%12%           | *10. O=[Ce][Ce]=O%12%51         | #10. O=[Ce][Ce]=O%12%51         |
| *11. O=[Ce][Ce]=O%11%63         | +11. O=[Ce][Ce]=O%11%63         | +11. O=[Ce][Ce]=O%11%63         |
| +12. [Co]=O.O=[Co]O[Co]=O%11%51 | +12. [Co]=O.O=[Co]O[Co]=O%11%51 | *12. [Co]=O.O=[Co]O[Co]=O%11%51 |
| -13. [Co]=O.O=[Co]O[Co]=O%11%51 | -13. [Co]=O.O=[Co]O[Co]=O%11%51 | +13. [Co]=O.O=[Co]O[Co]=O%11%51 |
| #14. [Co]=O%15%51               | #14. [Co]=O%15%51               | +14. [Co]=O%15%51               |
| *15. [Co]=O%14%52               | #15. [Co]=O%14%52               | -15. [Co]=O%14%52               |
| +16. O=[Cr]O[Cr]=O%24%52        | #16. O=[Cr]O[Cr]=O%24%52        | #16. O=[Cr]O[Cr]=O%24%52        |
| #17. O=[Cr]O[Cr]=O%14%52        | #17. O=[Cr]O[Cr]=O%14%52        | +17. O=[Cr]O[Cr]=O%14%52        |
| -18. [Cu]=O%12%51               | +18. [Cu]=O%12%51               | #18. [Cu]=O%12%51               |
| -19. [Cu]=O%11%51               | *19. [Cu]=O%11%51               | -19. [Cu]=O%11%51               |
| +20. [Cu]=O%11%52               | #20. [Cu]=O%11%52               | *20. [Cu]=O%11%52               |
| -21. [Cu]=O%12%52               | *21. [Cu]=O%12%52               | +21. [Cu]=O%12%52               |
| +22. O=[Dy]O[Dy]=O%11%53        | +22. O=[Dy]O[Dy]=O%11%53        | -22. O=[Dy]O[Dy]=O%11%53        |
| +23. O=[Fe]O[Fe]=O%12%55        | +23. O=[Fe]O[Fe]=O%12%55        | #23. O=[Fe]O[Fe]=O%12%55        |
| -24. O=[Fe]O[Fe]=O%12%58        | *24. O=[Fe]O[Fe]=O%12%58        | -24. O=[Fe]O[Fe]=O%12%58        |
| -25. O=[Fe]O[Fe]=O%11%51        | +25. O=[Fe]O[Fe]=O%11%51        | #25. O=[Fe]O[Fe]=O%11%51        |
| -26. O=[Fe]O[Fe]=O%15%80        | *26. O=[Fe]O[Fe]=O%15%80        | #26. O=[Fe]O[Fe]=O%15%80        |
| +27. O=[Fe].O=[Fe]O[Fe]=O%11%51 | +27. O=[Fe].O=[Fe]O[Fe]=O%11%51 | *27. O=[Fe].O=[Fe]O[Fe]=O%11%51 |
| +28. O=[Fe].O=[Fe]O[Fe]=O%12%54 | +28. O=[Fe].O=[Fe]O[Fe]=O%12%54 | *28. O=[Fe].O=[Fe]O[Fe]=O%12%54 |
| #29. O=[Fe].O=[Fe]O[Fe]=O%19%51 | #29. O=[Fe].O=[Fe]O[Fe]=O%19%51 | +29. O=[Fe].O=[Fe]O[Fe]=O%19%51 |
| -30. O=[Fe].O=[Fe]O[Fe]=O%11%51 | #30. O=[Fe].O=[Fe]O[Fe]=O%11%51 | +30. O=[Fe].O=[Fe]O[Fe]=O%11%51 |

|                               |                                |                               |
|-------------------------------|--------------------------------|-------------------------------|
| +31. O=[Gd]O[Gd]=O%13%51      | *31. O=[Gd]O[Gd]=O%13%51 6.500 | *31. O=[Gd]O[Gd]=O%13%51      |
| #32. O=[Hf]=O%12%52           | +32. O=[Hf]=O%12%52            | +32. O=[Hf]=O%12%52           |
| +33. O=[In]O[In]=O%13%51      | +33. O=[In]O[In]=O%13%51       | +33. O=[In]O[In]=O%13%51      |
| #34. O=[In]O[In]=O%15%51      | -34. O=[In]O[In]=O%15%51       | +34. O=[In]O[In]=O%15%51      |
| -35. O=[In]O[In]=O%15%52      | *35. O=[In]O[In]=O%15%52       | #35. O=[In]O[In]=O%15%52      |
| -36. O=[In]O[In]=O%11%52      | -36. O=[In]O[In]=O%11%52       | +36. O=[In]O[In]=O%11%52      |
| #37. O=[La]O[La]=O%12%51      | -37. O=[La]O[La]=O%12%51       | -37. O=[La]O[La]=O%12%51      |
| +38. O=[La]O[La]=O%15%53      | #38. O=[La]O[La]=O%15%53       | +38. O=[La]O[La]=O%15%53      |
| +39. O=[Mg]%11%60             | -39. O=[Mg]%11%60              | *39. O=[Mg]%11%60             |
| -40. O=[Mn]O[Mn]=O%14%52      | +40. O=[Mn]O[Mn]=O%14%52       | -40. O=[Mn]O[Mn]=O%14%52      |
| -41. O=[Mn]O[Mn]O[Mn]=O%11%52 | #41. O=[Mn]O[Mn]O[Mn]=O%11%52  | +41. O=[Mn]O[Mn]O[Mn]=O%11%52 |
| -42. O=[Ni]O[Ni]=O%20%52      | +42. O=[Ni]O[Ni]=O%20%52       | -42. O=[Ni]O[Ni]=O%20%52      |
| #43. [Ni]=O%11%51             | -43. [Ni]=O%11%51              | -43. [Ni]=O%11%51             |
| #44. [Ni]=O%12%59             | *44. [Ni]=O%12%59              | *44. [Ni]=O%12%59             |
| +45. [Ni]=O%11%52             | *45. [Ni]=O%11%52              | *45. [Ni]=O%11%52             |
| *46. [Ni]=O%11%52             | #46. [Ni]=O%11%52              | +46. [Ni]=O%11%52             |
| +47. O=[Sb]O[Sb]=O%12%51      | -47. O=[Sb]O[Sb]=O%12%51       | -47. O=[Sb]O[Sb]=O%12%51      |
| #48. O=[Sb]O[Sb]=O%11%51      | #48. O=[Sb]O[Sb]=O%11%51       | +48. O=[Sb]O[Sb]=O%11%51      |
| +49. O=[Sb]O[Sb]=O%16%53      | *49. O=[Sb]O[Sb]=O%16%53       | -49. O=[Sb]O[Sb]=O%16%53      |
| #50. O=[Si]=O%11%52           | #50. O=[Si]=O%11%52            | -50. O=[Si]=O%11%52           |
| *51. O=[Si]=O%11%51           | #51. O=[Si]=O%11%51            | *51. O=[Si]=O%11%51           |
| *52. O=[Si]=O%18%51           | *52. O=[Si]=O%18%51            | *52. O=[Si]=O%18%51           |
| +53. O=[Si]=O%11%51           | #53. O=[Si]=O%11%51            | *53. O=[Si]=O%11%51           |
| -54. O=[Si]=O%13%51           | +54. O=[Si]=O%13%51            | *54. O=[Si]=O%13%51           |
| *55. O=[Si]=O%14%51           | -55. O=[Si]=O%14%51            | -55. O=[Si]=O%14%51           |
| *56. O=[Si]=O%18%51           | -56. O=[Si]=O%18%51            | +56. O=[Si]=O%18%51           |
| -57. O=[Si]=O%40%54           | -57. O=[Si]=O%40%54            | #57. O=[Si]=O%40%54           |
| +58. O=[Si]=O%12%57           | #58. O=[Si]=O%12%57            | #58. O=[Si]=O%12%57           |
| +59. O=[Sn]=O%15%51           | -59. O=[Sn]=O%15%51            | +59. O=[Sn]=O%15%51           |
| +60. O=[Sn]=O%11%70           | *60. O=[Sn]=O%11%70            | +60. O=[Sn]=O%11%70           |
| -61. O=[Ti]=O%12%52           | *61. O=[Ti]=O%12%52            | +61. O=[Ti]=O%12%52           |
| *62. O=[Ti]=O%19%51           | +62. O=[Ti]=O%19%51            | +62. O=[Ti]=O%19%51           |
| *63. O=[Ti]=O%14%53           | #63. O=[Ti]=O%14%53            | #63. O=[Ti]=O%14%53           |
| -64. O=[Ti]=O%11%51           | +64. O=[Ti]=O%11%51            | +64. O=[Ti]=O%11%51           |
| #65. O=[Ti]=O%18%51           | *65. O=[Ti]=O%18%51            | -65. O=[Ti]=O%18%51           |
| +66. O=[Ti]=O%11%51           | -66. O=[Ti]=O%11%51            | +66. O=[Ti]=O%11%51           |
| #67. O=[Ti]=O%11%51           | *67. O=[Ti]=O%11%51            | #67. O=[Ti]=O%11%51           |
| +68. O=[Ti]=O%11%58           | +68. O=[Ti]=O%11%58            | +68. O=[Ti]=O%11%58           |
| +69. O=[Ti]=O%17%58           | +69. O=[Ti]=O%17%58            | -69. O=[Ti]=O%17%58           |
| +70. O=[Ti]=O%14%58           | *70. O=[Ti]=O%14%58            | #70. O=[Ti]=O%14%58           |
| *71. O=[Ti]=O%11%64           | +71. O=[Ti]=O%11%64            | *71. O=[Ti]=O%11%64           |
| -72. O=[Ti]=O%13%54           | -72. O=[Ti]=O%13%54            | *72. O=[Ti]=O%13%54           |
| *73. O=[W](=O)=O%11%51        | #73. O=[W](=O)=O%11%51         | *73. O=[W](=O)=O%11%51        |
| +74. O=[W](=O)=O%11%51        | +74. O=[W](=O)=O%11%51         | -74. O=[W](=O)=O%11%51        |
| +75. O=[W](=O)=O%11%53        | #75. O=[W](=O)=O%11%53         | -75. O=[W](=O)=O%11%53        |
| *76. O=[Y]O[Y]=O%13%52        | -76. O=[Y]O[Y]=O%13%52         | #76. O=[Y]O[Y]=O%13%52        |
| #77. O=[Y]O[Y]=O%13%52        | *77. O=[Y]O[Y]=O%13%52         | #77. O=[Y]O[Y]=O%13%52        |
| -78. O=[Yb]O[Yb]=O%15%52      | -78. O=[Yb]O[Yb]=O%15%52       | -78. O=[Yb]O[Yb]=O%15%52      |
| *79. [Zn]=O%12%51             | +79. [Zn]=O%12%51              | -79. [Zn]=O%12%51             |
| +80. [Zn]=O%12%53             | #80. [Zn]=O%12%53              | -80. [Zn]=O%12%53             |
| #81. [Zn]=O%12%54             | -81. [Zn]=O%12%54              | *81. [Zn]=O%12%54             |
| -82. [Zn]=O%13%53             | #82. [Zn]=O%13%53              | *82. [Zn]=O%13%53             |
| -83. [Zn]=O%12%51             | *83. [Zn]=O%12%51              | *83. [Zn]=O%12%51             |
| #84. [Zn]=O%11%52             | +84. [Zn]=O%11%52              | #84. [Zn]=O%11%52             |
| +85. [Zn]=O%15%58             | +85. [Zn]=O%15%58              | -85. [Zn]=O%15%58             |
| +86. O=[Zr]=O%13%52           | *86. O=[Zr]=O%13%52            | +86. O=[Zr]=O%13%52           |
| #87. O=[Zr]=O%12%62           | *87. O=[Zr]=O%12%62            | -87. O=[Zr]=O%12%62           |
